# Supplementary material for: Will daytime community calcification reflect reef accretion on future, degraded coral reefs?
Source: Copernicus journal article supplement (doi:10.5194/bg-19-891-2022), 2022-02-14
Supplement: Supplementary file 1 [file bg-19-891-2022-supplement.pdf]

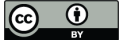

*Supplement of*

## **Will daytime community calcification reflect reef accretion on future, degraded coral reefs?**

**Coulson A. Lantz et al.**

*Correspondence to:* Coulson A. Lantz (coulsonlantz@gmail.com)

The copyright of individual parts of the supplement might differ from the article licence.

1 **Tables**

2 Table S1: One-way ANOVA results (p-values) comparing measured percent coral and algae cover  
 3 between triplicate transects within each Lagoon site (Lagoon site 1, Lagoon site 2). Data were pooled  
 4 among replicate point-contact survey efforts ( $n = 2 \text{ transect}^{-1}$ ). A **bolded** value (p-value < 0.05)  
 5 indicates that the percent cover significantly differed between transects within each Lagoon site.

| <b>Point-Contact Survey Method</b> |                      |                |                      |                |
|------------------------------------|----------------------|----------------|----------------------|----------------|
| <b>Cover</b>                       | <b>Lagoon site 1</b> |                | <b>Lagoon site 2</b> |                |
|                                    | <b>df</b>            | <b>p-value</b> | <b>df</b>            | <b>p-value</b> |
| % Coral Cover                      | 2                    | 0.791          | 2                    | 0.959          |
| % Algae Cover                      | 2                    | 0.256          | 2                    | 0.214          |
| % Sediment Cover                   | 2                    | 0.421          | 2                    | 0.956          |

6

7

8 Table S2: One-way ANOVA results (p-values) comparing measured percent coral and algae cover  
 9 between Lagoon site 1 and Lagoon site 2. Data were pooled among replicate point-contact survey  
 10 efforts and triplicate transects within each Lagoon site ( $n = 6 \text{ site}^{-1}$ ). A **bolded** value (p-value < 0.05)  
 11 indicates that the percent cover significantly differed between Lagoon sites.

| <b>Point-Contact Survey Method</b> |           |                  |
|------------------------------------|-----------|------------------|
| <b>Cover</b>                       | <b>df</b> | <b>p - value</b> |
| % Coral Cover                      | <b>1</b>  | <b>0.001</b>     |
| % Algae Cover                      | <b>1</b>  | <b>0.011</b>     |
| % Sediment Cover                   | 1         | 0.122            |

12

13

14

15

16

17

18 Table S3: One-way ANOVA results (p-values) comparing measured percent coral and algae cover  
 19 between triplicate transects within each Lagoon site (Lagoon site 1, Lagoon site 2). Data were pooled  
 20 among triplicate photo-quadrat survey efforts over time ( $n = 120 \text{ transect}^{-1}$ ). A **bolded** value (p-value  
 21 < 0.05) indicates that the percent cover significantly differed between transects.

| <b>Photo-Quadrat Survey Method</b> |                      |                |                      |                |
|------------------------------------|----------------------|----------------|----------------------|----------------|
| <b>Cover</b>                       | <b>Lagoon site 1</b> |                | <b>Lagoon site 2</b> |                |
|                                    | <b>df</b>            | <b>p-value</b> | <b>df</b>            | <b>p-value</b> |
| % Coral Cover                      | 2                    | 0.469          | 2                    | 0.818          |
| % Algae Cover                      | 2                    | 0.721          | 2                    | 0.796          |
| % Sediment Cover                   | 2                    | 0.859          | 2                    | 0.403          |

22

23

24 Table S4: One-way ANOVA results (p-values) comparing measured percent coral and algae cover  
 25 between Lagoon site 1 and Lagoon site 2. Data were pooled among triplicate photo-quadrat survey  
 26 efforts and triplicate transects within each Lagoon site (n = 360 site<sup>-1</sup>). A **bolded** value (p-value < 0.05)  
 27 indicates that the percent cover significantly differed between Lagoon site 1 and Lagoon site 2.

| Photo-Quadrat Survey Method |          |              |
|-----------------------------|----------|--------------|
| Cover                       | df       | p - value    |
| % Coral Cover               | <b>1</b> | <b>0.000</b> |
| % Algae Cover               | 1        | 0.273        |
| % Sediment Cover            | 1        | 0.140        |

28

29 Table S5: One-way ANOVA results for percent bleached coral tissue (Coral Bleaching) and percent  
 30 sediment exhibiting overgrowth (Sediment Overgrowth) compared over the three survey efforts  
 31 through time (Jan 24, Feb 6, and Feb12 2020) at Lagoon site 1. Data were pooled among all triplicate  
 32 transects. Tukey HSD post-hoc test results are to compare differences between each survey effort (n =  
 33 3). A **bolded** value (p-value < 0.05) indicates that the difference was significant between time points.

| Photo-Quadrat Survey Method: Lagoon site 1 |          |          |                  |              |             |                         |               |
|--------------------------------------------|----------|----------|------------------|--------------|-------------|-------------------------|---------------|
| Lagoon site 1                              |          | df       | F-value          | p - value    |             |                         |               |
| Coral Bleaching                            |          | <b>2</b> | <b>67.2</b>      | <b>0.000</b> |             |                         |               |
| Sediment Overgrowth                        |          | <b>2</b> | <b>18.3</b>      | <b>0.003</b> |             |                         |               |
| Tukey HSD                                  |          |          |                  |              |             |                         |               |
| Dependent Variable                         | (I) Time | (J) Time | Mean             | Std. Error   | Sig.        | 95% Confidence Interval |               |
|                                            |          |          | Difference (I-J) |              |             | Lower Bound             | Upper Bound   |
| Coral Bleaching                            | Jan 24   | Feb 6    | <b>-16.33</b>    | <b>4.93</b>  | <b>.037</b> | <b>-31.48</b>           | <b>-1.18</b>  |
|                                            |          | Feb 12   | <b>-55.66</b>    | <b>4.93</b>  | <b>.000</b> | <b>-70.81</b>           | <b>-40.51</b> |
|                                            | Feb 6    | Jan 24   | <b>16.33</b>     | <b>4.93</b>  | <b>.037</b> | <b>1.18</b>             | <b>31.48</b>  |
|                                            |          | Feb 12   | <b>-39.33</b>    | <b>4.93</b>  | <b>.001</b> | <b>-54.48</b>           | <b>-24.18</b> |
|                                            | Jan 24   | Feb 6    | <b>55.66</b>     | <b>4.93</b>  | <b>.000</b> | <b>40.51</b>            | <b>70.81</b>  |
|                                            |          | Feb 12   | <b>39.33</b>     | <b>4.93</b>  | <b>.001</b> | <b>24.18</b>            | <b>54.48</b>  |
| Sediment Overgrowth                        | Jan 24   | Feb 6    | -2.33            | 1.36         | .275        | -6.50                   | 1.84          |
|                                            |          | Feb 12   | <b>-8.00</b>     | <b>1.36</b>  | <b>.003</b> | <b>-12.17</b>           | <b>-3.82</b>  |
|                                            | Feb 6    | Jan 24   | 2.33             | 1.36         | .275        | -1.84                   | 6.50          |
|                                            |          | Feb 12   | <b>-5.66</b>     | <b>1.36</b>  | <b>.014</b> | <b>-9.84</b>            | <b>-1.49</b>  |
|                                            | Jan 24   | Feb 6    | <b>8.00</b>      | <b>1.36</b>  | <b>.003</b> | <b>3.82</b>             | <b>12.17</b>  |

|        |             |             |             |             |             |
|--------|-------------|-------------|-------------|-------------|-------------|
| Feb 12 | <b>5.66</b> | <b>1.36</b> | <b>.014</b> | <b>1.49</b> | <b>9.84</b> |
|--------|-------------|-------------|-------------|-------------|-------------|

34

35 Table S6: One-way ANOVA results for percent bleached coral tissue (Coral Bleaching) and percent  
 36 sediment exhibiting overgrowth (Sediment Overgrowth) compared over the three survey efforts  
 37 through time (Jan 24, Feb 6, and Feb12 2020) at Lagoon site 2. Data were pooled among all triplicate  
 38 transects. Tukey HSD post-hoc test results are to compare differences between each survey effort (n =  
 39 3). A **bolded** value (p-value < 0.05) indicates that the difference was significant between time points.

| Photo-Quadrat Survey Method: Lagoon site 2 |          |          |                       |             |             |                         |               |
|--------------------------------------------|----------|----------|-----------------------|-------------|-------------|-------------------------|---------------|
| Lagoon site 2                              |          | df       | F-value               | p - value   |             |                         |               |
| Coral Bleaching                            |          | <b>2</b> | <b>142.9</b>          | <b>.000</b> |             |                         |               |
| Sediment Overgrowth                        |          | <b>2</b> | <b>10.5</b>           | <b>.011</b> |             |                         |               |
| Tukey HSD                                  |          |          |                       |             |             |                         |               |
| Dependent Variable                         | (I) Time | (J) Time | Mean Difference (I-J) | Std. Error  | Sig.        | 95% Confidence Interval |               |
|                                            |          |          |                       |             |             | Lower Bound             | Upper Bound   |
| Coral Bleaching                            | Jan 24   | Feb 6    | <b>-24.00</b>         | <b>3.88</b> | <b>.002</b> | <b>-35.92</b>           | <b>-12.07</b> |
|                                            |          | Feb 12   | <b>-65.00</b>         | <b>3.88</b> | <b>.000</b> | <b>-76.92</b>           | <b>-53.07</b> |
|                                            | Feb 6    | Jan 24   | <b>24.00</b>          | <b>3.88</b> | <b>.002</b> | <b>12.07</b>            | <b>35.92</b>  |
|                                            |          | Feb 12   | <b>-41.00</b>         | <b>3.88</b> | <b>.000</b> | <b>-52.92</b>           | <b>-29.07</b> |
|                                            | Jan 24   | Feb 6    | <b>65.00</b>          | <b>3.88</b> | <b>.000</b> | <b>53.07</b>            | <b>76.92</b>  |
|                                            |          | Feb 12   | <b>41.00</b>          | <b>3.88</b> | <b>.000</b> | <b>29.07</b>            | <b>52.92</b>  |
| Sediment Overgrowth                        | Jan 24   | Feb 6    | -3.00                 | 2.8         | .564        | -11.59                  | 5.59          |
|                                            |          | Feb 12   | <b>-12.33</b>         | <b>2.80</b> | <b>.011</b> | <b>-20.93</b>           | <b>-3.73</b>  |
|                                            | Feb 6    | Jan 24   | 3.00                  | 2.80        | .564        | -5.59                   | 11.59         |
|                                            |          | Feb 12   | <b>-9.33</b>          | <b>2.80</b> | <b>.036</b> | <b>-17.93</b>           | <b>-.73</b>   |
|                                            | Jan 24   | Feb 6    | <b>12.33</b>          | <b>2.80</b> | <b>.011</b> | <b>3.73</b>             | <b>20.93</b>  |
|                                            |          | Feb 12   | <b>9.33</b>           | <b>2.80</b> | <b>.036</b> | <b>.73</b>              | <b>17.93</b>  |

40 Table S7: One-way ANOVA results for percent bleached coral tissue (Coral Bleaching) and percent  
 41 sediment exhibiting overgrowth (Sediment Overgrowth) compared over the three survey efforts

42 through time (Jan 24, Feb 6, and Feb12 2020) between Lagoon site 1 and Lagoon site 2. Data were  
 43 pooled among all triplicate transects. A **bolded** value (p-value < 0.05) indicates that the difference was  
 44 significant between Lagoon sites.

| Photo-Quadrat Survey Method |                 |           |                     |           |
|-----------------------------|-----------------|-----------|---------------------|-----------|
|                             | Coral Bleaching |           | Sediment Overgrowth |           |
| Date                        | df              | p - value | df                  | p - value |
| Jan 24 2020                 | 1               | 1.00      | 1                   | 0.899     |
| Feb 6 2020                  | 1               | 0.067     | 1                   | 0.692     |
| Feb 12 2020                 | 1               | 0.256     | 1                   | 0.231     |

45  
46  
47  
48  
49  
50  
51  
52  
53  
54  
55  
56  
57  
58  
59  
60  
61

Table S8: List of invertebrate taxonomy described in section 3.2.4.

| Group | Taxon                 | Common name |
|-------|-----------------------|-------------|
| Algae | <i>Caulerpa</i> spp.  |             |
|       | Chlorophyta spp.      | Green algae |
|       | <i>Halimeda</i> spp.  |             |
|       | <i>Laurencia</i> spp. |             |
|       | <i>Padina</i> sp.     |             |

|             |                               |                          |
|-------------|-------------------------------|--------------------------|
|             | Rhodophyta spp.               | Red algae                |
|             | <i>Valonia ventricosa</i>     | Sailor's eyeball alga    |
| Corals      | <i>Acropora secale</i>        |                          |
|             | <i>Acropora millepora</i>     |                          |
|             | <i>Acropora muricata</i>      |                          |
|             | <i>Acropora</i> spp.          | Staghorn corals          |
|             | <i>Astrea curta</i>           |                          |
|             | <i>Cyphastrea chalcidicum</i> |                          |
|             | <i>Dipsastraea</i> sp.        |                          |
|             | <i>Favites halicora</i>       |                          |
|             | <i>Favites rotundata</i>      |                          |
|             | <i>Goniastrea edwardsi</i>    | Honeycomb coral          |
|             | <i>Goniopora</i> sp.          | Flowerpot coral          |
|             | <i>Isopora palifera</i>       |                          |
|             | <i>Cladiella</i> sp.          |                          |
|             | <i>Lobophyllia agaricia</i>   |                          |
|             | <i>Montipora digitata</i>     |                          |
|             | <i>Montipora grisea</i>       |                          |
|             | <i>Montipora hispida</i>      |                          |
|             | <i>Montipora</i> sp.          |                          |
|             | <i>Platygyra daedalea</i>     | Lesser valley coral      |
|             | <i>Platygyra</i> spp.         |                          |
|             | <i>Pocillopora damicornis</i> |                          |
|             | <i>Pocillopora</i> sp.        | Cauliflower coral        |
|             | <i>Porites attenuate</i>      |                          |
|             | <i>Porites cylindrica</i>     | Yellow finger coral      |
|             | <i>Porites</i> sp.            | Pore coral               |
|             | <i>Sarcophyton</i> spp.       | Toadstool leather corals |
|             | <i>Stylophora pistillata</i>  | Hood coral               |
| Crustaceans | Alpheidae sp.                 | Snapping shrimp          |
|             | <i>Alpheus</i> sp.            | Snapping shrimp          |

|             |                                |                           |
|-------------|--------------------------------|---------------------------|
|             | Brachyura spp.                 | Crabs                     |
|             | <i>Calcinus latens</i>         | Hidden hermit crab        |
|             | Caridea sp.                    | Caridean shrimp           |
|             | <i>Clibanarius corallinus</i>  | Coral hermit crab         |
|             | <i>Dardanus megistos</i>       | White-spotted hermit crab |
|             | Majidae sp.                    | Spider crab               |
|             | Stomatopoda spp.               | Mantis shrimps            |
|             | <i>Thalamita</i> sp.           |                           |
|             | <i>Trapezia serenei</i>        | Coral crab                |
|             | <i>Zenopontonia soror</i>      | Seastar shrimp            |
| Echinoderms | <i>Culcita novaeguineae</i>    | Pillow cushion star       |
|             | <i>Holothuria atra</i>         | Lollyfish sea cucumber    |
|             | <i>Holothuria edulis</i>       | Pinkfish sea cucumber     |
|             | <i>Holothuria leucospilota</i> | Black sea cucumber        |
|             | <i>Holothuria</i> sp.          |                           |
|             | <i>Linckia guildingi</i>       | Guilding's sea star       |
|             | <i>Linckia laevigata</i>       | Blue linckia              |
|             | <i>Nardoa novaecaledoniae</i>  | Yellow mesh sea star      |
|             | <i>Stichopus herrmanni</i>     | Herrmann's sea cucumber   |
|             | <i>Stichopus chloronotus</i>   | Greenfish sea cucumber    |
| Molluscs    | <i>Aplysia argus</i>           | White-speckled seahare    |
|             | <i>Atactodea striata</i>       | Striate beach clam        |
|             | <i>Codakia paytenorum</i>      | Payten's codakia          |
|             | <i>Chrysostoma paradoxum</i>   | Orange-mouthed top shell  |
|             | <i>Clypeomorus bifasciata</i>  | Double-banded creeper     |
|             | <i>Coralliophila</i> sp.       |                           |
|             | Ergalataxinae                  |                           |
|             | <i>Gymnodoris</i> sp.          |                           |
|             | <i>Melo amphora</i>            | Giant baler               |
|             | <i>Pitar</i> sp.               |                           |
|             | <i>Spondylus</i> sp.           | Thorny oyster             |

|             |                                    |                            |
|-------------|------------------------------------|----------------------------|
|             | <i>Tectus fenestratus</i>          | Latticed top shell         |
|             | <i>Tonna chinensis</i>             | China tun                  |
|             | <i>Tridacna maxima</i>             | Small giant clam           |
|             | <i>Tubulophilinopsis gardineri</i> | Gardiner's headshield slug |
|             | <i>Turbo argyrostomus</i>          | Silvermouth turban         |
| Polychaetes | <i>Perinereis</i> sp.              |                            |
|             | <i>Spirobranchus</i> sp.           | Christmas tree worm        |
|             | Terebellidae sp.                   | Spaghetti worm             |
| Sponges     | Porifera sp.                       |                            |

62 Table S9: Shapiro-Wilk test for normality in reef metabolism. Data are organized by rates of NEP and  
63 NEC measured at Lagoon site 1, Lagoon site 2, and the larger lagoon area (Slack Water). Data for each  
64 Lagoon site were pooled among triplicate parallel transects. NEP data were not included for the slack-  
65 water method. If the significant value (Sig.) of the test is > 0.05 the data exhibit a normal distribution.

|     |               | Shapiro-Wilk |    |      |
|-----|---------------|--------------|----|------|
|     | Site          | Statistic    | df | Sig. |
| NEP | Lagoon site 1 | .951         | 36 | .112 |
|     | Lagoon site 2 | .984         | 36 | .857 |
|     | Slack Water   |              |    |      |
| NEC | Lagoon site 1 | .967         | 36 | .356 |
|     | Lagoon site 2 | .952         | 36 | .117 |
|     | Slack Water   | .962         | 33 | .287 |

66  
67  
68  
69



70

71

72 Table S10: One-way ANOVA results (p-values) comparing measured reef metabolism (NEP and NEC)  
73 between triplicate transects within each Lagoon site (Lagoon site 1, Lagoon site 2, and Slack Water).  
74 Data were pooled among all 11 (Slack water) and 12 (Lagoon site 1 and Lagoon site 2) days of  
75 measurements (3 days for Night NEC). A **bolded** value (p-value < 0.05) indicates that the measured  
76 response in that specific metabolic parameter significantly differed between triplicate transects.

| Metabolism | Lagoon site 1 |         | Lagoon site 2 |         | Slack Water |         |
|------------|---------------|---------|---------------|---------|-------------|---------|
|            | df            | p-value | df            | p-value | df          | p-value |
| NEP        | 2             | .471    | 2             | .917    |             |         |
| NEC        | 2             | .169    | 2             | .489    | 2           | .581    |
| Night NEC  |               |         |               |         | 2           | .617    |

77

78

79

80

81 Table S11: One-way ANOVA results (p-values) comparing measured reef metabolism (NEP and NEC)  
82 between measurement days within each Lagoon site (Lagoon site 1 and Lagoon site 2 = 12; Slack  
83 Water = 11; Night NEC = 3). Data were pooled among all triplicate transects. A **bolded** value (p-value  
84 < 0.05) indicates that the measured response in that specific metabolic parameter significantly differed  
85 between triplicate transects.

| Metabolism | Lagoon site 1 |         | Lagoon site 2 |         | Slack Water |         |
|------------|---------------|---------|---------------|---------|-------------|---------|
|            | df            | p-value | df            | p-value | df          | p-value |
| NEP        | 11            | .181    | 11            | .099    |             |         |
| NEC        | 11            | .506    | 11            | .365    | 10          | .073    |
| Night NEC  |               |         |               |         | 2           | .083    |

86

87 Table S12: One-way ANOVA results for NEP compared amongst Lagoon site 1 and Lagoon site 2 and  
 88 for NEC compared amongst Lagoon site 1, Lagoon site 2, and Slack Water. Data were pooled among  
 89 all triplicate transects and measurements days. Tukey HSD post-hoc test results are displayed for NEC  
 90 (n = 3). A **bolded** value (p-value < 0.05) indicates that the difference was significant between Lagoon  
 91 sites.

| Metabolism |  | df       | F-value     | p - value   |
|------------|--|----------|-------------|-------------|
| NEP        |  | 1        | 3.47        | .067        |
| NEC        |  | <b>2</b> | <b>8.17</b> | <b>.001</b> |

  

| Tukey HSD         |               |                       |                |             |                         |                |
|-------------------|---------------|-----------------------|----------------|-------------|-------------------------|----------------|
| (I) Site (J) Site |               | Mean Difference (I-J) | Std. Error     | Sig.        | 95% Confidence Interval |                |
|                   |               |                       |                |             | Lower Bound             | Upper Bound    |
| Lagoon site 1     | Lagoon site 2 | -.8742                | 1.015          | .666        | -3.2916                 | 1.5431         |
|                   | Slack Water   | <b>3.0361*</b>        | <b>1.015</b>   | <b>.010</b> | <b>.6187</b>            | <b>5.4534</b>  |
| Lagoon site 2     | Lagoon site 1 | .8742                 | 1.015          | .666        | -1.5431                 | 3.2916         |
|                   | Slack Water   | <b>3.9103*</b>        | <b>1.015</b>   | <b>.001</b> | <b>1.4929</b>           | <b>6.3277</b>  |
| Slack Water       | Lagoon site 1 | <b>-3.0361*</b>       | <b>1.015</b>   | <b>.010</b> | <b>-5.4534</b>          | <b>-.6187</b>  |
|                   | Lagoon site 2 | <b>-3.9103*</b>       | <b>1.01544</b> | <b>.001</b> | <b>-6.3277</b>          | <b>-1.4929</b> |

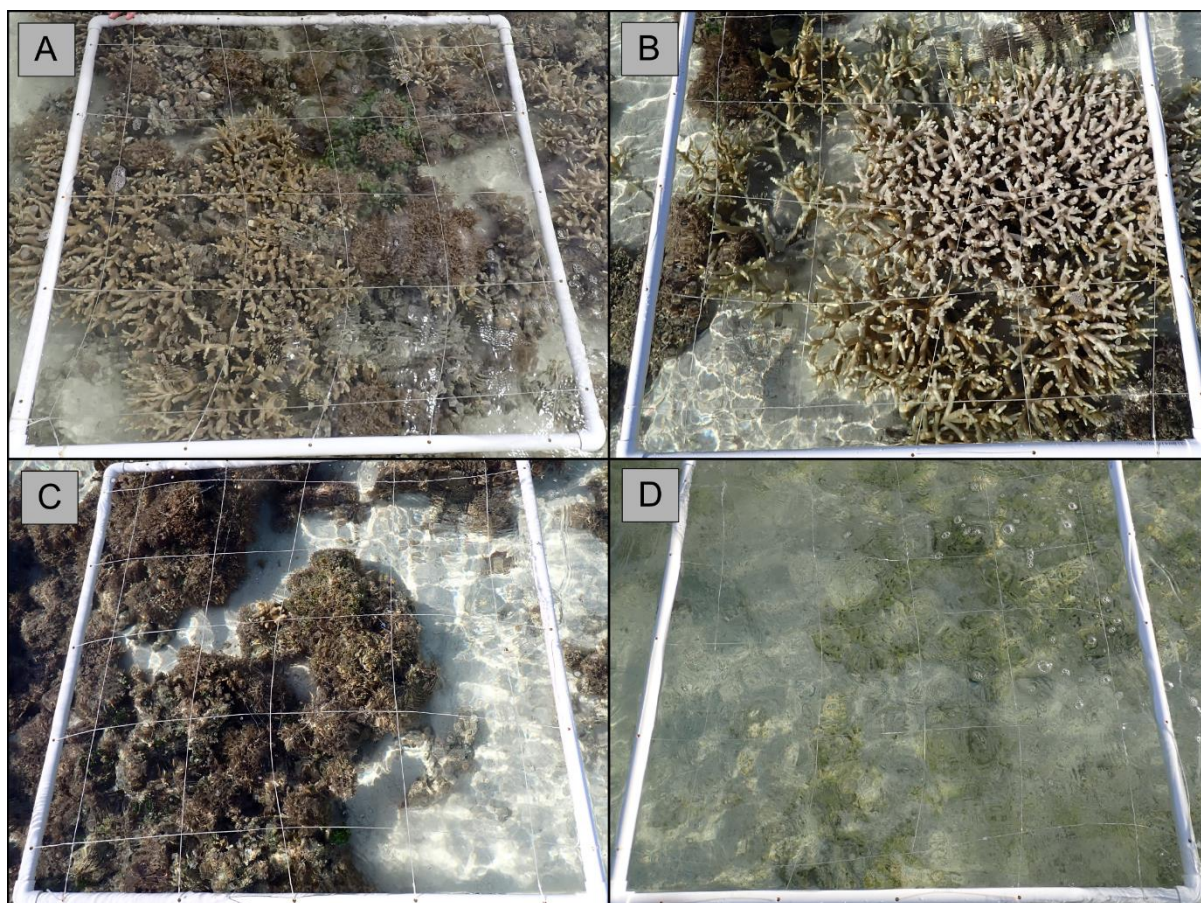

93

94 Figure S.1: Photo-quadrat examples of various reef health. A) Healthy *Acropora* spp. coral observed  
95 during the first survey effort. B) Bleached *Acropora* spp. observed during the final survey effort. C)  
96 Example of fleshy algal growth as the dominant benthic organism D) Example of Chlorophyta  
97 overgrowth on the sediment.

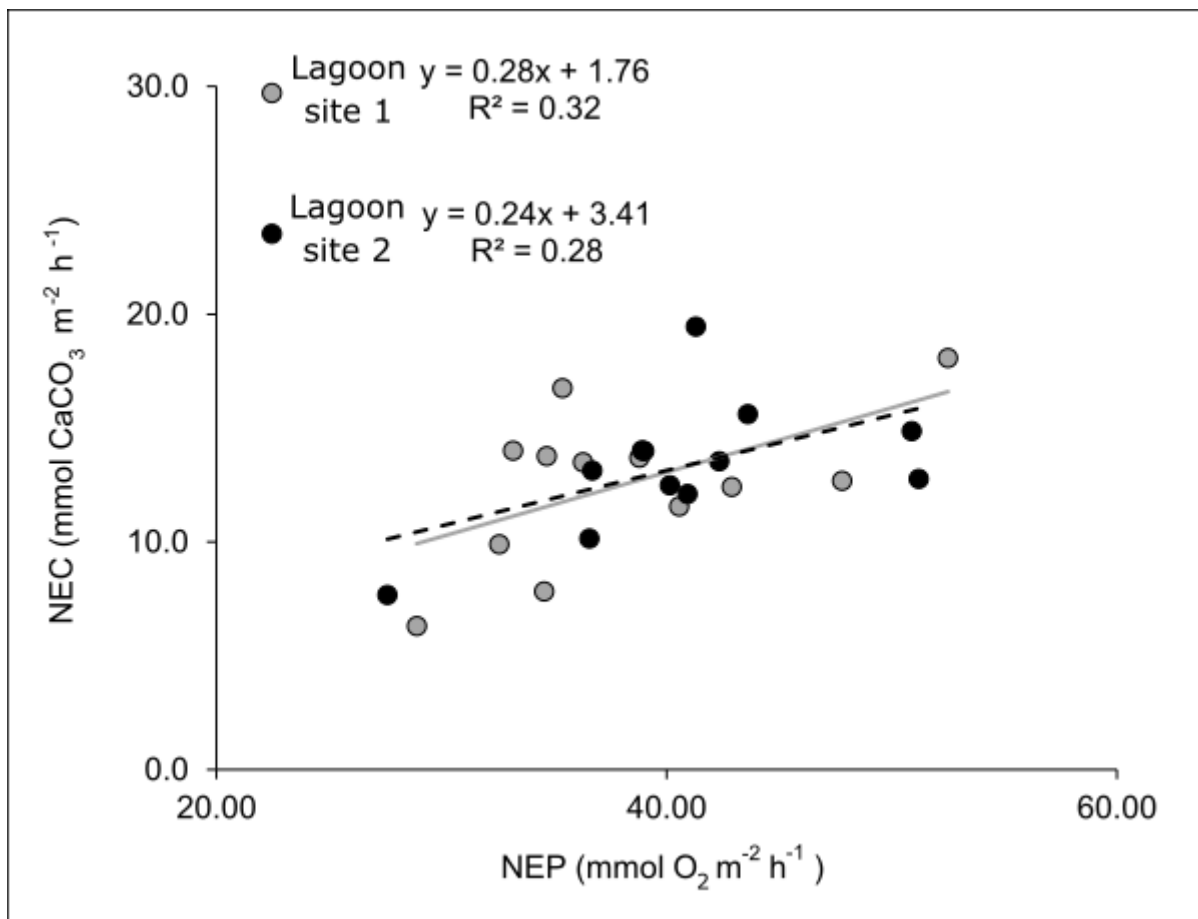

98

99 Figure S.2: Rates of net ecosystem calcification (NEC) as a function of net ecosystem production  
 100 (NEP) separated between study Lagoon site 1 (grey) and Lagoon site 2 (black).

101
